# Supplementary material for: Impact of 19 years of mass drug administration with ivermectin on epilepsy burden in a hyperendemic onchocerciasis area in Cameroon
Source: PubMed Central journal article supplement (PMC6423875; doi:10.1186/s13071-019-3345-7), 2019-03-19
Supplement: 13071_2019_3345_MOESM1_ESM.pdf [file 13071_2019_3345_MOESM1_ESM.pdf]

## QUESTIONNAIRE AU NIVEAU MENAGE: DEPISTAGE de l'EPILEPSIE

Nom de l'enquêteur: \_\_\_\_\_ Signature: \_\_\_\_\_  
Village: \_\_\_\_\_ Date (JJ/MM/AAAA): \_\_ \_\_ / \_\_ \_\_ / 201\_\_

### Caractéristiques du ménage:

**CODE UNIQUE du ménage (E/VV/MMM):** \_\_ / \_\_ \_\_ / \_\_ \_\_ \_\_

(E = numéro équipe; VV = numéro village; MMM = numéro ménage)

1) Nom du chef de ménage (\*): \_\_\_\_\_ Tel \_\_\_\_\_

2) Est-ce que la famille est originaire du village:  OUI  NON Si non, depuis quand la famille vit dans le village? \_\_\_\_\_ (années)

3) Activité principale génératrice de revenus de la famille:

Agriculteur  Eleveur de bétail  Pêcheur  Employé  Artisan  Autre, spécifiez: \_\_\_\_\_

4) Est-ce qu'un membre du ménage avec épilepsie est décédé?  OUI  NON  NE SAIT PAS

Si OUI, Quand (année): \_\_\_\_\_

A quel âge: \_\_\_\_\_ ans

Si OUI, Quand (année): \_\_\_\_\_

A quel âge: \_\_\_\_\_ ans

Si OUI, Quand (année): \_\_\_\_\_

A quel âge: \_\_\_\_\_ ans

Si OUI, Quand (année): \_\_\_\_\_

A quel âge: \_\_\_\_\_ ans

Si OUI, Quand (année): \_\_\_\_\_

A quel âge: \_\_\_\_\_ ans

### **(\*) Définition ménage:**

*l'ensemble des occupants d'un même logement sans que ces personnes soient nécessairement unies par des liens de parenté;*

*L'INSEE utilise comme définition pour ménage le critère de consommation, c.-à-d. les personnes prenant leurs repas en commun.*

**DEPISTAGE EPILEPSIE:**

Pour chaque personne du ménage poser les 5 questions aux membres du ménage concerné  
Si au moins 1 OUI, proposer de participer à l'étude et référer au neurologue. [\*IN : INconnu]

| 1. No. pers.             |                          | 2. Age                                                    | 3. Genre                   |                            | 4.1 QUESTION 1                                                                              |                              |                             | 4.2 QUESTION 2                                                                        |                              |                             | 4.3 QUESTION 3                                                                                                                         |                              |                             | 4.4 QUESTION 4                                                                                                                                |                              |                             | 4.5 QUESTION 5                                                                                                   |                              |                             |
|--------------------------|--------------------------|-----------------------------------------------------------|----------------------------|----------------------------|---------------------------------------------------------------------------------------------|------------------------------|-----------------------------|---------------------------------------------------------------------------------------|------------------------------|-----------------------------|----------------------------------------------------------------------------------------------------------------------------------------|------------------------------|-----------------------------|-----------------------------------------------------------------------------------------------------------------------------------------------|------------------------------|-----------------------------|------------------------------------------------------------------------------------------------------------------|------------------------------|-----------------------------|
| Présent                  | Absent                   | (années ou mois)<br>Exemple: 9 mois = 9M;<br>12 ans = 12A | M=masculin;<br>F=féminin   |                            | Perte(s) de connaissance;<br>avec ou sans perte d'urine;<br>avec ou sans émission de bave ? |                              |                             | Absence(s) ou perte(s) de contact avec l'entourage de début brutal et de durée brève? |                              |                             | Secousses ou mouvements anormaux incontrôlables d'un ou des membres (convulsions), de début soudain et d'une durée de quelques minutes |                              |                             | Apparition brutale et de durée brève de sensations corporelles étranges, d'hallucinations ou d'illusions visuelles, auditives ou olfactives ? |                              |                             | A-t-on déjà dit au sujet qu'il était épileptique ou qu'il avait déjà fait <b>au moins 2 crises d'épilepsie ?</b> |                              |                             |
| <input type="checkbox"/> | <input type="checkbox"/> |                                                           | M <input type="checkbox"/> | F <input type="checkbox"/> | OUI <input type="checkbox"/>                                                                | NON <input type="checkbox"/> | IN <input type="checkbox"/> | OUI <input type="checkbox"/>                                                          | NON <input type="checkbox"/> | IN <input type="checkbox"/> | OUI <input type="checkbox"/>                                                                                                           | NON <input type="checkbox"/> | IN <input type="checkbox"/> | OUI <input type="checkbox"/>                                                                                                                  | NON <input type="checkbox"/> | IN <input type="checkbox"/> | OUI <input type="checkbox"/>                                                                                     | NON <input type="checkbox"/> | IN <input type="checkbox"/> |
| <input type="checkbox"/> | <input type="checkbox"/> |                                                           | M <input type="checkbox"/> | F <input type="checkbox"/> | OUI <input type="checkbox"/>                                                                | NON <input type="checkbox"/> | IN <input type="checkbox"/> | OUI <input type="checkbox"/>                                                          | NON <input type="checkbox"/> | IN <input type="checkbox"/> | OUI <input type="checkbox"/>                                                                                                           | NON <input type="checkbox"/> | IN <input type="checkbox"/> | OUI <input type="checkbox"/>                                                                                                                  | NON <input type="checkbox"/> | IN <input type="checkbox"/> | OUI <input type="checkbox"/>                                                                                     | NON <input type="checkbox"/> | IN <input type="checkbox"/> |
| <input type="checkbox"/> | <input type="checkbox"/> |                                                           | M <input type="checkbox"/> | F <input type="checkbox"/> | OUI <input type="checkbox"/>                                                                | NON <input type="checkbox"/> | IN <input type="checkbox"/> | OUI <input type="checkbox"/>                                                          | NON <input type="checkbox"/> | IN <input type="checkbox"/> | OUI <input type="checkbox"/>                                                                                                           | NON <input type="checkbox"/> | IN <input type="checkbox"/> | OUI <input type="checkbox"/>                                                                                                                  | NON <input type="checkbox"/> | IN <input type="checkbox"/> | OUI <input type="checkbox"/>                                                                                     | NON <input type="checkbox"/> | IN <input type="checkbox"/> |
| <input type="checkbox"/> | <input type="checkbox"/> |                                                           | M <input type="checkbox"/> | F <input type="checkbox"/> | OUI <input type="checkbox"/>                                                                | NON <input type="checkbox"/> | IN <input type="checkbox"/> | OUI <input type="checkbox"/>                                                          | NON <input type="checkbox"/> | IN <input type="checkbox"/> | OUI <input type="checkbox"/>                                                                                                           | NON <input type="checkbox"/> | IN <input type="checkbox"/> | OUI <input type="checkbox"/>                                                                                                                  | NON <input type="checkbox"/> | IN <input type="checkbox"/> | OUI <input type="checkbox"/>                                                                                     | NON <input type="checkbox"/> | IN <input type="checkbox"/> |
| <input type="checkbox"/> | <input type="checkbox"/> |                                                           | M <input type="checkbox"/> | F <input type="checkbox"/> | OUI <input type="checkbox"/>                                                                | NON <input type="checkbox"/> | IN <input type="checkbox"/> | OUI <input type="checkbox"/>                                                          | NON <input type="checkbox"/> | IN <input type="checkbox"/> | OUI <input type="checkbox"/>                                                                                                           | NON <input type="checkbox"/> | IN <input type="checkbox"/> | OUI <input type="checkbox"/>                                                                                                                  | NON <input type="checkbox"/> | IN <input type="checkbox"/> | OUI <input type="checkbox"/>                                                                                     | NON <input type="checkbox"/> | IN <input type="checkbox"/> |
| <input type="checkbox"/> | <input type="checkbox"/> |                                                           | M <input type="checkbox"/> | F <input type="checkbox"/> | OUI <input type="checkbox"/>                                                                | NON <input type="checkbox"/> | IN <input type="checkbox"/> | OUI <input type="checkbox"/>                                                          | NON <input type="checkbox"/> | IN <input type="checkbox"/> | OUI <input type="checkbox"/>                                                                                                           | NON <input type="checkbox"/> | IN <input type="checkbox"/> | OUI <input type="checkbox"/>                                                                                                                  | NON <input type="checkbox"/> | IN <input type="checkbox"/> | OUI <input type="checkbox"/>                                                                                     | NON <input type="checkbox"/> | IN <input type="checkbox"/> |
| <input type="checkbox"/> | <input type="checkbox"/> |                                                           | M <input type="checkbox"/> | F <input type="checkbox"/> | OUI <input type="checkbox"/>                                                                | NON <input type="checkbox"/> | IN <input type="checkbox"/> | OUI <input type="checkbox"/>                                                          | NON <input type="checkbox"/> | IN <input type="checkbox"/> | OUI <input type="checkbox"/>                                                                                                           | NON <input type="checkbox"/> | IN <input type="checkbox"/> | OUI <input type="checkbox"/>                                                                                                                  | NON <input type="checkbox"/> | IN <input type="checkbox"/> | OUI <input type="checkbox"/>                                                                                     | NON <input type="checkbox"/> | IN <input type="checkbox"/> |
| <input type="checkbox"/> | <input type="checkbox"/> |                                                           | M <input type="checkbox"/> | F <input type="checkbox"/> | OUI <input type="checkbox"/>                                                                | NON <input type="checkbox"/> | IN <input type="checkbox"/> | OUI <input type="checkbox"/>                                                          | NON <input type="checkbox"/> | IN <input type="checkbox"/> | OUI <input type="checkbox"/>                                                                                                           | NON <input type="checkbox"/> | IN <input type="checkbox"/> | OUI <input type="checkbox"/>                                                                                                                  | NON <input type="checkbox"/> | IN <input type="checkbox"/> | OUI <input type="checkbox"/>                                                                                     | NON <input type="checkbox"/> | IN <input type="checkbox"/> |
| <input type="checkbox"/> | <input type="checkbox"/> |                                                           | M <input type="checkbox"/> | F <input type="checkbox"/> | OUI <input type="checkbox"/>                                                                | NON <input type="checkbox"/> | IN <input type="checkbox"/> | OUI <input type="checkbox"/>                                                          | NON <input type="checkbox"/> | IN <input type="checkbox"/> | OUI <input type="checkbox"/>                                                                                                           | NON <input type="checkbox"/> | IN <input type="checkbox"/> | OUI <input type="checkbox"/>                                                                                                                  | NON <input type="checkbox"/> | IN <input type="checkbox"/> | OUI <input type="checkbox"/>                                                                                     | NON <input type="checkbox"/> | IN <input type="checkbox"/> |
| <input type="checkbox"/> | <input type="checkbox"/> |                                                           | M <input type="checkbox"/> | F <input type="checkbox"/> | OUI <input type="checkbox"/>                                                                | NON <input type="checkbox"/> | IN <input type="checkbox"/> | OUI <input type="checkbox"/>                                                          | NON <input type="checkbox"/> | IN <input type="checkbox"/> | OUI <input type="checkbox"/>                                                                                                           | NON <input type="checkbox"/> | IN <input type="checkbox"/> | OUI <input type="checkbox"/>                                                                                                                  | NON <input type="checkbox"/> | IN <input type="checkbox"/> | OUI <input type="checkbox"/>                                                                                     | NON <input type="checkbox"/> | IN <input type="checkbox"/> |
| <input type="checkbox"/> | <input type="checkbox"/> |                                                           | M <input type="checkbox"/> | F <input type="checkbox"/> | OUI <input type="checkbox"/>                                                                | NON <input type="checkbox"/> | IN <input type="checkbox"/> | OUI <input type="checkbox"/>                                                          | NON <input type="checkbox"/> | IN <input type="checkbox"/> | OUI <input type="checkbox"/>                                                                                                           | NON <input type="checkbox"/> | IN <input type="checkbox"/> | OUI <input type="checkbox"/>                                                                                                                  | NON <input type="checkbox"/> | IN <input type="checkbox"/> | OUI <input type="checkbox"/>                                                                                     | NON <input type="checkbox"/> | IN <input type="checkbox"/> |
| <input type="checkbox"/> | <input type="checkbox"/> |                                                           | M <input type="checkbox"/> | F <input type="checkbox"/> | OUI <input type="checkbox"/>                                                                | NON <input type="checkbox"/> | IN <input type="checkbox"/> | OUI <input type="checkbox"/>                                                          | NON <input type="checkbox"/> | IN <input type="checkbox"/> | OUI <input type="checkbox"/>                                                                                                           | NON <input type="checkbox"/> | IN <input type="checkbox"/> | OUI <input type="checkbox"/>                                                                                                                  | NON <input type="checkbox"/> | IN <input type="checkbox"/> | OUI <input type="checkbox"/>                                                                                     | NON <input type="checkbox"/> | IN <input type="checkbox"/> |
| <input type="checkbox"/> | <input type="checkbox"/> |                                                           | M <input type="checkbox"/> | F <input type="checkbox"/> | OUI <input type="checkbox"/>                                                                | NON <input type="checkbox"/> | IN <input type="checkbox"/> | OUI <input type="checkbox"/>                                                          | NON <input type="checkbox"/> | IN <input type="checkbox"/> | OUI <input type="checkbox"/>                                                                                                           | NON <input type="checkbox"/> | IN <input type="checkbox"/> | OUI <input type="checkbox"/>                                                                                                                  | NON <input type="checkbox"/> | IN <input type="checkbox"/> | OUI <input type="checkbox"/>                                                                                     | NON <input type="checkbox"/> | IN <input type="checkbox"/> |
| <input type="checkbox"/> | <input type="checkbox"/> |                                                           | M <input type="checkbox"/> | F <input type="checkbox"/> | OUI <input type="checkbox"/>                                                                | NON <input type="checkbox"/> | IN <input type="checkbox"/> | OUI <input type="checkbox"/>                                                          | NON <input type="checkbox"/> | IN <input type="checkbox"/> | OUI <input type="checkbox"/>                                                                                                           | NON <input type="checkbox"/> | IN <input type="checkbox"/> | OUI <input type="checkbox"/>                                                                                                                  | NON <input type="checkbox"/> | IN <input type="checkbox"/> | OUI <input type="checkbox"/>                                                                                     | NON <input type="checkbox"/> | IN <input type="checkbox"/> |
| <input type="checkbox"/> | <input type="checkbox"/> |                                                           | M <input type="checkbox"/> | F <input type="checkbox"/> | OUI <input type="checkbox"/>                                                                | NON <input type="checkbox"/> | IN <input type="checkbox"/> | OUI <input type="checkbox"/>                                                          | NON <input type="checkbox"/> | IN <input type="checkbox"/> | OUI <input type="checkbox"/>                                                                                                           | NON <input type="checkbox"/> | IN <input type="checkbox"/> | OUI <input type="checkbox"/>                                                                                                                  | NON <input type="checkbox"/> | IN <input type="checkbox"/> | OUI <input type="checkbox"/>                                                                                     | NON <input type="checkbox"/> | IN <input type="checkbox"/> |
| <input type="checkbox"/> | <input type="checkbox"/> |                                                           | M <input type="checkbox"/> | F <input type="checkbox"/> | OUI <input type="checkbox"/>                                                                | NON <input type="checkbox"/> | IN <input type="checkbox"/> | OUI <input type="checkbox"/>                                                          | NON <input type="checkbox"/> | IN <input type="checkbox"/> | OUI <input type="checkbox"/>                                                                                                           | NON <input type="checkbox"/> | IN <input type="checkbox"/> | OUI <input type="checkbox"/>                                                                                                                  | NON <input type="checkbox"/> | IN <input type="checkbox"/> | OUI <input type="checkbox"/>                                                                                     | NON <input type="checkbox"/> | IN <input type="checkbox"/> |
| <input type="checkbox"/> | <input type="checkbox"/> |                                                           | M <input type="checkbox"/> | F <input type="checkbox"/> | OUI <input type="checkbox"/>                                                                | NON <input type="checkbox"/> | IN <input type="checkbox"/> | OUI <input type="checkbox"/>                                                          | NON <input type="checkbox"/> | IN <input type="checkbox"/> | OUI <input type="checkbox"/>                                                                                                           | NON <input type="checkbox"/> | IN <input type="checkbox"/> | OUI <input type="checkbox"/>                                                                                                                  | NON <input type="checkbox"/> | IN <input type="checkbox"/> | OUI <input type="checkbox"/>                                                                                     | NON <input type="checkbox"/> | IN <input type="checkbox"/> |
| <input type="checkbox"/> | <input type="checkbox"/> |                                                           | M <input type="checkbox"/> | F <input type="checkbox"/> | OUI <input type="checkbox"/>                                                                | NON <input type="checkbox"/> | IN <input type="checkbox"/> | OUI <input type="checkbox"/>                                                          | NON <input type="checkbox"/> | IN <input type="checkbox"/> | OUI <input type="checkbox"/>                                                                                                           | NON <input type="checkbox"/> | IN <input type="checkbox"/> | OUI <input type="checkbox"/>                                                                                                                  | NON <input type="checkbox"/> | IN <input type="checkbox"/> | OUI <input type="checkbox"/>                                                                                     | NON <input type="checkbox"/> | IN <input type="checkbox"/> |
| <input type="checkbox"/> | <input type="checkbox"/> |                                                           | M <input type="checkbox"/> | F <input type="checkbox"/> | OUI <input type="checkbox"/>                                                                | NON <input type="checkbox"/> | IN <input type="checkbox"/> | OUI <input type="checkbox"/>                                                          | NON <input type="checkbox"/> | IN <input type="checkbox"/> | OUI <input type="checkbox"/>                                                                                                           | NON <input type="checkbox"/> | IN <input type="checkbox"/> | OUI <input type="checkbox"/>                                                                                                                  | NON <input type="checkbox"/> | IN <input type="checkbox"/> | OUI <input type="checkbox"/>                                                                                     | NON <input type="checkbox"/> | IN <input type="checkbox"/> |

**PERSONNES SUSPECTEES DE SOUFFRIR D'EPILEPSIE A REFERER VERS LE CENTRE DE SANTE (INFIRMIER/MEDECIN/NEUROLOGUE):**

|                            |                        |            |                 |                       |
|----------------------------|------------------------|------------|-----------------|-----------------------|
| CODE UNIQUE (E/VV/MMM/PP): | __ / __ / __ / __ / __ | Nom: _____ | Genre (M/F): __ | Age: _____ (ans/mois) |
| CODE UNIQUE (E/VV/MMM/PP): | __ / __ / __ / __ / __ | Nom: _____ | Genre (M/F): __ | Age: _____ (ans/mois) |
| CODE UNIQUE (E/VV/MMM/PP): | __ / __ / __ / __ / __ | Nom: _____ | Genre (M/F): __ | Age: _____ (ans/mois) |
| CODE UNIQUE (E/VV/MMM/PP): | __ / __ / __ / __ / __ | Nom: _____ | Genre (M/F): __ | Age: _____ (ans/mois) |
